# Supplementary material
Source: PubMed Central journal article supplement (PMC3249357)
Supplement: supp_111.134494_TableS2.pdf [file supp_111.134494_TableS2.pdf]

**Table S2** Observed values and simulated values of four summary statistics of nucleotide diversity and LD ( $\pi$ ,  $\delta_{ST}$ ,  $Z_{nS}$ , and  $Z_g$ ) for three classes of loci: selected loci (SL), intergenic loci (IL), and flanking loci (FL).

|               |       | Median values from simulations |                   |                                           |                                           |
|---------------|-------|--------------------------------|-------------------|-------------------------------------------|-------------------------------------------|
|               | Locus | Empirical values               | Equilibrium model | Isolation-with-migration model<br>$4Nm=0$ | Isolation-with-migration model<br>$4Nm=1$ |
| $\pi$         | SL    | 0.020                          | 0.032             | 0.016                                     | 0.018                                     |
|               | IL    | 0.021                          | 0.013             | 0.012                                     | 0.012                                     |
|               | FL    | 0.005                          | 0.012             | 0.013                                     | 0.012                                     |
| $\delta_{ST}$ | SL    | 0.011                          | 0.013             | 0.019                                     | 0.022                                     |
|               | IL    | 0.010                          | 0.002             | 0.014                                     | 0.015                                     |
|               | FL    | 0.002                          | 0.001             | 0.015                                     | 0.013                                     |
| $Z_{nS}$      | SL    | 0.159                          | 0.158             | 0.060                                     | 0.064                                     |
|               | IL    | 0.185                          | 0.112             | 0.057                                     | 0.057                                     |
|               | FL    | 0.108                          | 0.099             | 0.055                                     | 0.053                                     |
| $Z_g$         | SL    | 0.102                          | 0.096             | 0.008                                     | 0.009                                     |
|               | IL    | 0.088                          | 0.021             | 0.007                                     | 0.007                                     |
|               | FL    | 0.064                          | 0.009             | 0.005                                     | 0.005                                     |

The empirical measures of diversity and LD for the ‘selected loci’ are an average value for the two *HBB* paralogs, measures for the intergenic loci are an average value for *F4* and *F5*, and measures for the flanking loci are an average value for *HBB* and *OlfR67*; see Fig. 1). Median values for the ‘equilibrium’ model of population structure are graphically depicted in Figure 6B. Median values for the ‘isolation-with-migration’ models of population structure were parameterized with results of the IMA analyses (see text for details). For the isolation-with-migration simulations, the ancestral population size was 200 and the total descendant population size was 1670; the ratio of these values was derived from the IMA analysis. The number of generations since population divergence was 0.15 times the contemporary  $N_e$  for the total population. Simulation results for two different isolation-with-migration models are presented, the first with no gene flow since population divergence and the second with  $4Nm=1$ .
